# Supplementary material
Source: Royal Society of Chemistry journal article supplement (doi:10.1039/d6su00190d)
Supplement: d6su00190d1.pdf [file d6su00190d1.pdf]

# Electrified, decentralised upcycling of Platinum-Group Metals from spent automotive catalysts into functional electrocatalysts

## – Supplementary information

*Luis F. Leon-Fernandez<sup>1,†,\*</sup>, Frantisek Kukurugya<sup>1</sup>, Omar Martinez-Mora<sup>1,2</sup>, Stefanos Mourdikoudis<sup>1,‡</sup>, Lunjie Zeng<sup>3</sup>, Maria M. Parascanu<sup>4</sup>, Aitana Saez<sup>4</sup>, Jan Fransaer<sup>2</sup>, Jeroen Spooren<sup>1</sup>, Xochitl Dominguez-Benetton<sup>1,§,\*</sup>*

<sup>1</sup> Material and Chemistry Unit (MatCh), Flemish Institute for Technological Research (VITO), Boeretang 200, 2400, Mol, Belgium.

<sup>2</sup> Department of Materials Engineering, Surface and Interface Engineered Materials, Katholieke Universiteit Leuven, Kasteelpark Arenberg 44 - box 2450, 3001 Leuven, Belgium.

<sup>3</sup> Department of Physics, Chalmers University of Technology, 41296 Göteborg, Sweden

<sup>4</sup> TECNALIA, Basque Research and Technology Alliance (BRTA), Astondo Bidea, Edificio 700, Derio, 48160, Spain

<sup>†</sup> *Current affiliation:* Applied Electrochemistry & Catalysis (ELCAT), University of Antwerp, Universiteitsplein 1, 2610, Wilrijk, Belgium

<sup>‡</sup> *Current affiliation:* CINBIO, Universidade de Vigo, Department of Physical Chemistry, Campus Universitario Lagoas Marcosende, Vigo, 36310 Spain

<sup>§</sup> *Current affiliation:* Equinor Energy Belgium, Kortenberglaan 120, 1000, Brussels, Belgium

## 1. ESI-I Basis and Sensitivity Analysis of Lost PGM Recovery Potential

For the EU alone, using the Commission's estimate of ~3.5 million 'missing' ELVs per year and conservative catalyst-loading assumptions, the unrealised secondary supply from missing vehicles alone is on the order of ~7–22 t PGM per year, equivalent to ~6–19% of EU total PGM demand (or ~8–24% of EU automotive PGM demand) in 2022.

Anchor facts:

1. EU "missing ELVs" = ~3.5 million per year ( $\approx$  one-third of deregistered vehicles)<sup>1</sup>.
2. 2022 EU automotive PGM demand = ~2.956 million oz  $\approx$  92 t (Pt+Pd+Rh)<sup>2</sup>.
3. 2022 EU total PGM demand (Pt+Pd) = ~111 t (Pt 40.5 t, Pd 70.7 t; Rh not regionally tabulated)<sup>2</sup>.
4. 2022 global Rh demand = 31.3 t; using Europe's auto share (~24.2% of global auto PGM demand) gives EU Rh  $\approx$  7–8 t<sup>2</sup>.

Estimate of unrealised EU secondary supply from "missing ELVs" (7–22 t range):

- As a share of EU total PGM demand (~119 t in 2022, Pt+Pd+Rh)  $\rightarrow$  ~6–19%.
- As a share of EU automotive PGM demand (~92 t)  $\rightarrow$  ~8–24%<sup>2</sup>.

Given that automotive catalysts dominate PGM use and considering ELV leakage (often greater outside the EU) alongside low recovery from non-automotive streams, a conservative unrealised recovery opportunity is ~10–20% of annual PGM demand.

[1] European Commission. End-of-life vehicles regulation | Environment — European Commission. [https://environment.ec.europa.eu/topics/waste-and-recycling/end-life-vehicles/end-life-vehicles-regulation\\_en](https://environment.ec.europa.eu/topics/waste-and-recycling/end-life-vehicles/end-life-vehicles-regulation_en) (2025).

[2] Johnson Matthey. PGM Market Report May 2022. <https://matthey.com/documents/161599/509428/PGM-market-report-May-2022.pdf> (2022).

## 2. ESI-II MATERIALS AND METHODS

### 2.1. MWAL Analytical methods

The elemental composition of the investigated samples was analysed using inductively coupled plasma optical emission spectroscopy (ICP-OES). Prior to ICP-OES analyses, solid samples underwent acid digestion. The specific acid digestion procedure was tailored to each sample based on the metals of interest and the sample's characteristics. For the automotive catalyst sample, for which Pt, Pd and Rh were the main elements to analyse, closed microwave oven digestion was performed using a mixture of HCl/HNO<sub>3</sub>/HBF<sub>4</sub>/H<sub>2</sub>O<sub>2</sub> (v/v = 5/4/3/3). The acid digestion was followed by ICP-OES analysis (Optima 3000 DV, PerkinElmer). Liquid samples were analysed exclusively by ICP-OES (Avio 500, PerkinElmer).

The mineralogical compositions of the initial samples were determined using powder X-ray diffraction (XRD) analysis. The XRD measurements were performed using a PANalytical Empyrean system (manufactured by PANalytical B.V. in Almelo, The Netherlands). The instrument was operated at 40 kV and 45 mA and equipped with a Co tube (1.7903 Å wavelength). Continuous XRD scans were conducted in a 2θ range of 5 to 120°. The resulting diffractograms were qualitatively analysed using HighScore Plus software to determine the mineralogical components present in the sample.

Particle size analyses were conducted using a vibratory sieve shaker (Model AS 200, Retsch, Germany). A set of sieves with specific pore sizes (1 mm and 0.5 mm) were assembled in a sieve stack for the analysis. The samples underwent sieving, and the resulting size fractions were collected and weighed. The finest fraction (< 0.5 mm) underwent additional analysis using a laser diffraction analyser (Partica mini LA-350, Horiba).

## 2.2. GDEx EXTENDED METHODOLOGY

### 2.2.1. Electrochemical cell operation

The general scheme of the three-compartment electrochemical reactor is depicted in Figure S1a. The general mechanism of the GDEx process for the precipitation of PGM NPs is presented in Figure S1b. The operating conditions are summarized in Table S1.

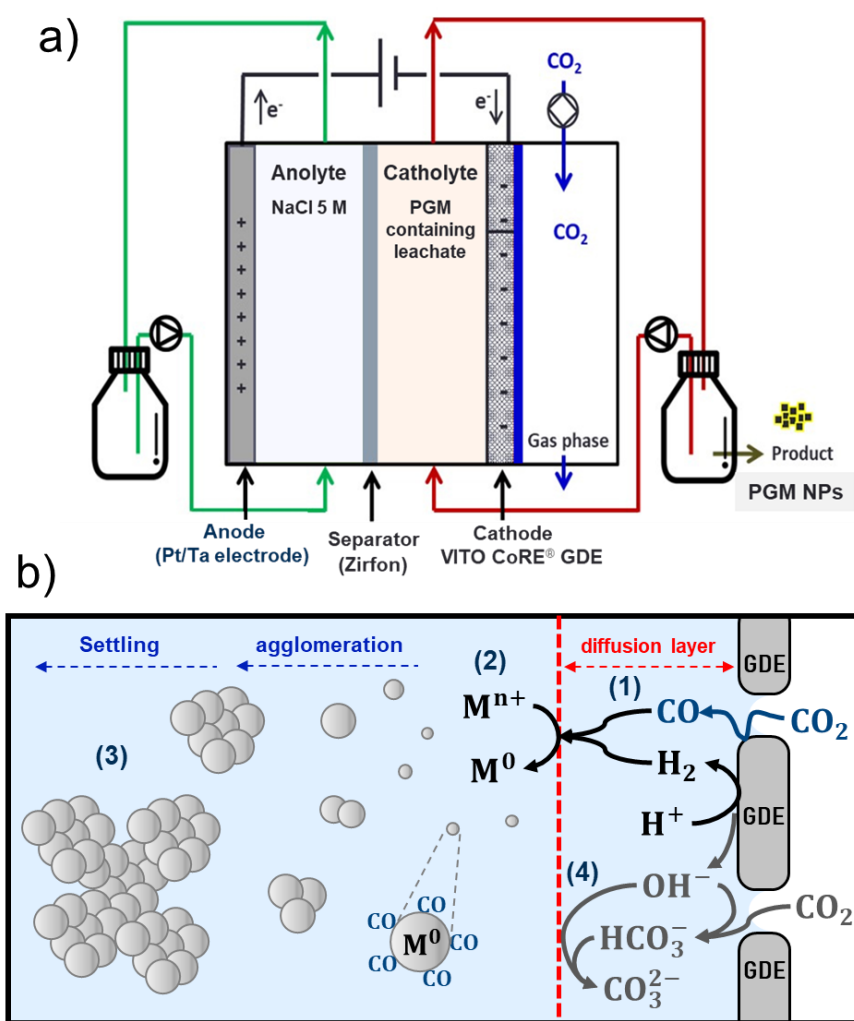

Figure S1. a) General scheme of the GDEx reaction b) General GDEx mechanism for the precipitation of PGM NPs at the cathode: (1) The CO<sub>2</sub> reduction reaction leads to the formation of CO, and the simultaneous water electrolysis to H<sub>2</sub>; (2) CO and H<sub>2</sub> react with the metal ions in solution, where CO also acts as a size limiting agent; (3) this leads to the formation of metal nanoparticles, which agglomerate and settle. (4) Electrochemically unreacted CO<sub>2</sub> may dissolve and undergo equilibrium reactions, buffering the pH rise, yielding bicarbonate or carbonate depending on the medium pH.

Table S1. Operating conditions in GDEx tests.

|                        |                                                                        |
|------------------------|------------------------------------------------------------------------|
| Catholyte (100 mL)     | Leachates from MWAL (pH < 0)<br>Conductivity ~ 450 mS cm <sup>-1</sup> |
| Anolyte (250 mL)       | NaCl 5 M                                                               |
| Cathode                | VITO CoRE <sup>®</sup> GDE                                             |
| Anode                  | Pt/Ta electrode                                                        |
| Current density        | -10 to -200 mA cm <sup>-2</sup>                                        |
| Electrode surface area | 10 cm <sup>2</sup>                                                     |
| Temperature            | 20–22 °C                                                               |
| Electrolyte flow rate  | 100 mL min <sup>-1</sup>                                               |
| Gas Flow rate          | 200 mL min <sup>-1</sup>                                               |
| Gas overpressure       | 20 mbar(g)                                                             |
| Reference electrode    | Ag/AgCl (KCl 3M)                                                       |

### 2.2.2. Gas flow regime

Two gas flow regimes were studied, the so-called flow-by (FB) and flow-through (FT) as illustrated in Figure S2. Under FB regime (Figure S2a), CO<sub>2</sub> was fed to the gas compartment with an overpressure of 20 mbar(g) and a flow rate of 200 mL min<sup>-1</sup>. Under this regime, CO<sub>2</sub> flux from the gas chamber to the catholyte is driven by diffusion. Under FT conditions (Figure S2b) the outlet of the gas chamber was closed, and the flow rate was set at 5 mL min<sup>-1</sup>. In this latter case, the CO<sub>2</sub> gas is thus forced to pass through the GDE, and therefore convective flow prevails in the system. When operating under gas FT regime, gas bubbles could be seen coming out of the GDE, both under electrochemical operation and at open circuit potential (OCP) conditions.

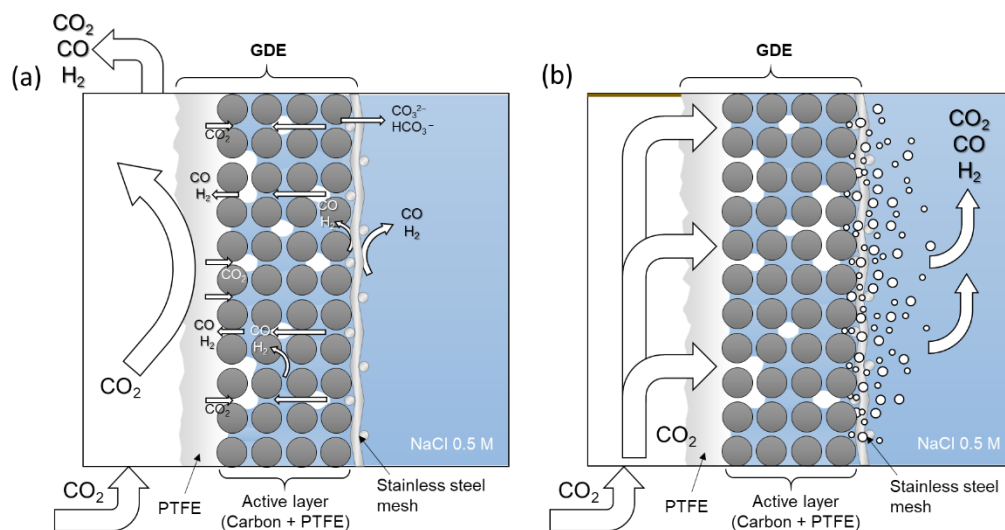

Figure S2. Different gas flow regimes investigated: (a) flow-by (FB) and (b) flow-through (FT).

### 2.2.3. Characterisation Methods

*X-ray diffraction (XRD)*: The dried samples were analysed by XRD in a PANalytical Empyrean diffractometer operated at a voltage of 40 kV and a current of 45 mA using a Co K $\alpha$  radiation source ( $\lambda = 1.7903 \text{ \AA}$ ). Measurements were performed with 4 s per step and a step size of  $0.05^\circ 2\theta$  in the  $20^\circ$ – $120^\circ 2\theta$  range. Profile fitting of the powder diffraction patterns was performed with Highscore Plus (Malvern Panalytical) using the Inorganic Crystal Structure Database (ICSD).

*Scanning Electron Microscopy (SEM)*: Micrographs of the dry samples were taken with a Philips XL30 FEG scanning electron microscope; images presented were recorded with secondary electrons and an acceleration voltage of 30 kV. The samples were prepared by dispersing the powders in ethanol and sonicating them for 30 min. Then, 10  $\mu\text{L}$  were dropped onto an aluminium foil mounted on a sample holder. The mean particle size and particle size distribution were evaluated by counting at least 100 particles using ImageJ software (National Institutes of Health, Bethesda, MD, USA, version 1.53t,

<https://imagej.net/ij/>) . After that, data were fitted to a lognormal distribution to obtain the mean particle size and standard deviation.

*Transmission Electron Microscopy (TEM):* A FEI Titan 80-300 TEM, operated at 300 kV, was used for bright field (BF) TEM imaging, and a JEOL monochromated ARM200F, equipped with probe Cs corrector and double SDD EDXS detector, was employed for STEM imaging and EDXS analysis. EDXS maps were obtained by integrating the intensity in the corresponding EDXS peaks from each element. The peaks used for mapping were manually selected to avoid overlapping between Rh-L and Pd-L, as well as Pt-M. The samples were prepared by dispersing the powders in distilled water. The dispersion was then drop-casted on a Cu TEM grid covered with holey carbon film. The grid was dried in ambient conditions for 15 min before being put in the TEM for measurements.

### **2.3. Assessment of the recovered PGM NPs as electrocatalysts for the Methanol Oxidation Reaction (MOR)**

The electrocatalytic activity of the different recovered PGM NPs was assessed using a three-electrode setup on a Bio-Logic (VMP3) multichannel potentiostat. A Pt coil (~3.6 cm<sup>2</sup>) was used as a counter electrode, along with an Ag/AgCl (3 M KCl) electrode as a reference electrode. A glassy carbon electrode (GCE, 3.0 mm diameter) was utilized as the working electrode. Before use, the GCE was polished with Al<sub>2</sub>O<sub>3</sub> (0.05 μm) and rinsed with Millipore Milli-Q<sup>®</sup> water. The potentials measured against the Ag/AgCl electrode ( $E_{\text{Ag/AgCl}}$ ) were converted to values against the reversible hydrogen electrode (RHE) ( $E_{\text{RHE}}$ ) using the equation  $E_{\text{RHE}} = E_{\text{Ag/AgCl}} + 0.059\text{pH} + E_{\text{Ag/AgCl}}^0$ , where  $E_{\text{Ag/AgCl}}^0$  is the potential of the Ag/AgCl (KCl 3 M) electrode vs. RHE (0.210 V).

To prepare the electrodes, 5 mg of each material was resuspended in water and sonicated for 30 minutes. 10  $\mu\text{L}$  of the suspensions were deposited onto the GCE and left to dry at room temperature; the Pt loading was controlled to be around 60-70  $\mu\text{g cm}^{-2}$ . Following this, 5  $\mu\text{L}$  of Nafion 0.5 wt% were added to the GCE and allowed to dry in air to ensure catalyst adhesion. First, the electrochemical surface area (ECSA) was calculated using the copper underpotential electrodeposition (CuUPD) method. Second, cyclic voltammetry (CV) was performed in Ar-saturated 0.5 M  $\text{H}_2\text{SO}_4$  at a high scan rate (100  $\text{mV s}^{-1}$ ) from 0.05 to 1.05 V vs. RHE until the CV did not change (around 100 cycles), then a CV at a scan rate of 10  $\text{mV s}^{-1}$  was performed. Subsequently, the electrodes were transferred to an Ar-saturated 0.5 M  $\text{H}_2\text{SO}_4$  + 5 mM  $\text{CuSO}_4$  solution. The CuUPD was performed at a fixed potential (0.360 V vs RHE) for 100 seconds, followed by a linear sweep voltammetry (LSV) scan from the fixed potential to the upper potential (1.05 V vs RHE) at 10  $\text{mV s}^{-1}$ . The charge associated with copper stripping was calculated to determine the charges associated with any oxide growth. This was done by subtracting the charge obtained using the same conditions in 0.5 M  $\text{H}_2\text{SO}_4$ . A specific charge of 0.42  $\mu\text{C cm}^{-2}$  was used to convert the coulombic charge to the surface area using the following formula:

$$\text{ECSA} = \frac{Q_{\text{CuUPD}} \times 100}{420 \mu\text{C cm}^{-2} \times L} = \text{m}^2 \text{g}^{-1} \quad (1)$$

where  $Q_{\text{CuUPD}}$  ( $\mu\text{C}$ ) is the charge associated with copper stripping and  $L$  ( $\mu\text{g}$ ) the Pt or total PGM loading.

For MOR activity, CVs were acquired at 50  $\text{mV s}^{-1}$  from 0.03 V to 1.05 V vs RHE in Ar-saturated 0.5 M  $\text{H}_2\text{SO}_4$  + 1.0 M methanol. The accelerated durability tests (ADT) were carried out using CVs for 1000 cycles at 50  $\text{mV s}^{-1}$  at the same potential window. The

results were normalised to the Pt or total PGM loading and ECSA, which were employed to determine the mass activity (MA) and specific activity (SA) according to the following formulae:

$$j_{MA} = \text{Mass activity} = \frac{j_f \times 1000}{L} = \text{mA mg}_{Pt}^{-1} \quad (2)$$

$$j_{SA} = \text{Specific activity} = \frac{j_{MA} \times 0.1}{ECSA} = \text{mA cm}^{-2} \quad (3)$$

where  $J_f$  is the measured current density at the peak potential.

## 2.4. Life-cycle assessment

Table S2. Life Cycle Inventory dataset for 1g of recovered PGM, Base case.

| Environmental aspect                              | Qnt.        | Unit     | LCI dataset                                                                                                                                                              |
|---------------------------------------------------|-------------|----------|--------------------------------------------------------------------------------------------------------------------------------------------------------------------------|
| Base case.L/S=5, 200 mA cm <sup>-2</sup> and NaCl |             |          |                                                                                                                                                                          |
| <b>Milling</b>                                    |             |          |                                                                                                                                                                          |
| Raw material                                      |             |          |                                                                                                                                                                          |
| Auto-catalyst Ceramic monoliths                   | 0.39        | kg       | -                                                                                                                                                                        |
| Energy consumption                                |             |          |                                                                                                                                                                          |
| Electricity                                       | 0.037       | kWh      | Electricity, low voltage <a href="#">{RER}</a>   market group for   Cut-off, U                                                                                           |
| Final output                                      |             |          |                                                                                                                                                                          |
| Auto-catalyst powder                              | 0.39        | kg       | -                                                                                                                                                                        |
| <b>MWAL</b>                                       |             |          |                                                                                                                                                                          |
| Raw material                                      |             |          |                                                                                                                                                                          |
| Auto-catalyst powder                              | 0.39        | kg       | -                                                                                                                                                                        |
| Ancillary/reactants                               |             |          |                                                                                                                                                                          |
| Hydrochloric acid 37%                             | 0.22        | L        | Stoichiometric calculation of 37% concentration based on dataset: Hydrochloric acid, without water, in 30% solution state <a href="#">{RER}</a>   market for   Cut-off,U |
| Energy consumption                                |             |          |                                                                                                                                                                          |
| Electricity                                       | 1           | kWh      | Electricity, low voltage <a href="#">{RER}</a>   market group for   Cut-off, U                                                                                           |
| Waste                                             |             |          |                                                                                                                                                                          |
| Solid residue                                     | 0.53        | kg       | Inert waste, for final disposal <a href="#">{RoW}</a>   treatment of inert waste, inert material landfill   Cut-off, U                                                   |
| Final output                                      |             |          |                                                                                                                                                                          |
| <b>MWAL Leachate</b>                              | <b>1.77</b> | <b>L</b> | -                                                                                                                                                                        |
| <b>GDEX</b>                                       |             |          |                                                                                                                                                                          |
| Raw material                                      |             |          |                                                                                                                                                                          |
| MWAL leachate                                     | 1.77        | L        | -                                                                                                                                                                        |
| Ancillary/reactants                               |             |          |                                                                                                                                                                          |
| Sodium chloride                                   | 8.27E-5     | kg       | Sodium chloride, powder <a href="#">{GLO}</a>   market for   Cut-off, U                                                                                                  |
| CO <sub>2</sub> gas                               | 3.28E-3     | kg       | Carbon dioxide, liquid <a href="#">{RER}</a>   market for   Cut-off, U                                                                                                   |
| Tap water                                         | 1.21        | L        | Tap water <a href="#">{RER}</a>   market group for   Cut-off, U                                                                                                          |
| Energy consumption                                |             |          |                                                                                                                                                                          |
| Electricity                                       | 0.08        | kWh      | Electricity, low voltage <a href="#">{RER}</a>   market group for   Cut-off, U                                                                                           |
| Waste/effluents/emissions                         |             |          |                                                                                                                                                                          |
| Spent anolyte                                     | 0.71        | L        | Neutralization*                                                                                                                                                          |
| Supernatant                                       | 0.52        | L        | Neutralization + precipitation**                                                                                                                                         |
| Cl <sub>2</sub> gas emission                      | 9.28E-3     | kg       | Emissions to air – Chlorine                                                                                                                                              |
| Spent CO <sub>2</sub> emission                    | 1.22E-3     | kg       | Emissions to air – Carbon dioxide                                                                                                                                        |
| Evaporated water                                  | 1.77E-5     | kg       | Emissions to air – water                                                                                                                                                 |
| Final output                                      |             |          |                                                                                                                                                                          |
| <b>PGM-NP dry pellets</b>                         | <b>1</b>    | <b>g</b> | -                                                                                                                                                                        |

- \*A theoretical neutralization process with sodium hydroxide for the acid spent anolyte effluent (pH 0.5) has been modelled. No process energy has been included
- \*\* A theoretical neutralization + precipitation process with sodium hydroxide for the acid supernatant effluent (pH 1) containing heavy metals has been modelled, based on stoichiometry of precipitation of bearing metals quantified by ICP-OES. No energy process has been included, and the resulting salts and metallic hydroxides sent to landfill.

## 2.5. Extended methodology Techno-Economic Assessment

The Weighted Average Cost of Capital (WACC) represents the average rate that a company is expected to pay to all its security holders to finance its assets. It is widely utilized as a hurdle rate in capital budgeting decisions. The WACC was calculated as follows:

$$\text{WACC} = \left(\frac{E}{V}\right) \times R_e + \left(\frac{D}{V}\right) \times R_d \times (1 - T_c) \quad (4)$$

where  $E$  represents the market value of equity,  $D$  the market value of debt,  $V$  the total market value of the company's financing (Equity + Debt),  $R_e$  is the cost of equity,  $R_d$  the pre-tax cost of debt, and  $T_c$  the corporate income tax rate (reflecting the tax deductibility of interest). The WACC calculation considers the relative weights of each component of the company's capital structure, reflecting the expected cost of new capital. WACC was estimated at 7%, derived from a 10% cost of equity ( $R_e$ ), 5% cost of debt ( $R_d$ ), a 50:50 debt–equity ratio ( $D/V = E/V = 0.5$ , with  $E$  and  $D$  the market values of equity and debt, and  $V = E + D$ ), and a 25% corporate tax rate ( $T_c$ ), representative of current EU levels ( $\text{WACC} = 0.5 \times 0.10 + 0.5 \times 0.05 \times (1 - 0.25) \approx 7\%$ ).

On the other hand, in financial analysis, the Net Present Value (NPV) is a key valuation metric that assesses the profitability of an investment or project. It represents the difference between the present value of cash inflows and the present value of cash outflows over the investment's lifetime. The NPV is calculated as follows:

$$\text{NPV} = \sum \frac{R_t}{(1+r)^t} - C_0 \quad (5)$$

Here,  $R_t$  is the net cash flow at time  $t$ , where  $t$  can range from 1 to  $n$  for the number of periods (being 10 years for the present TEA).  $C_0$  is the initial investment cost, and  $r$  is

the discount rate—which reflects the opportunity cost of the invested funds, the time value of money, and the risk associated with future cash flows. In a Techno-Economic Assessment (TEA) for a process that comprises the entirety of a company's operation, the discount rate  $r$  can be assumed to be the Weighted Average Cost of Capital (WACC). A positive NPV at this rate suggests that the process can generate value exceeding its cost of capital, indicating its financial feasibility.

The Operating Profit Margin—also known as Earnings Before Interest and Taxes (EBIT)—is calculated by subtracting operating expenses (such as wages, depreciation, and cost of goods sold) from gross revenue. The Operating Profit Margin is a profitability ratio that measures the percentage of revenue left over after all variable production costs have been paid. It measures a company's efficiency in generating profit from its core business operations, before considering the impact of financing and taxes.

$$\text{EBIT} = \frac{\text{Operating Income}}{\text{Revenue}} \times 100 \quad (6)$$

The Return on Investment (ROI) is a performance measure used to evaluate the efficiency or profitability of an investment. ROI is expressed as a percentage and is calculated using the formula:

$$\text{ROI} = \frac{\text{Net Profit}}{\text{Investment Cost}} \times 100 \quad (7)$$

where the *Net Profit* is the gain from the investment minus the cost of the investment and *Investment Cost* is the initial amount of money invested.

### 3. ESI-III THERMODYNAMIC REACTIONS AND EQUATIONS FOR GDEx

This section outlines the key electrochemical and chemical reactions involved in the GDEx process for reducing platinum group metal (PGM) complexes. These reactions form the basis for the mechanistic interpretation of PGM nanoparticle formation described in the main text.

- Electrochemical reactions at the cathode (standard conditions):

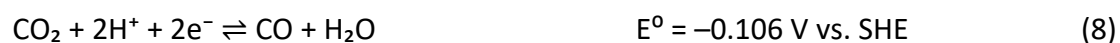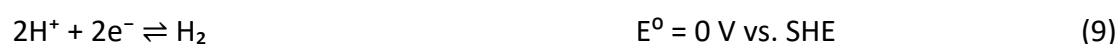

- Reduction of metal complexes by H<sub>2</sub> and/or CO:

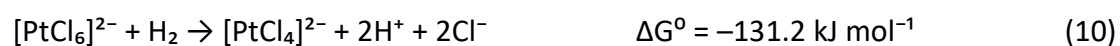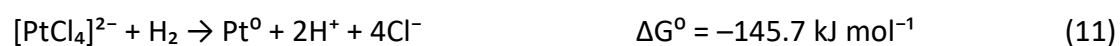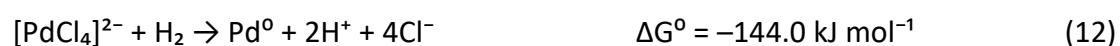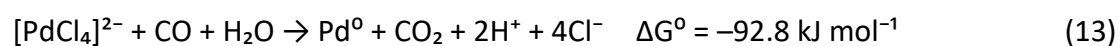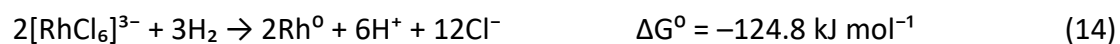

- Buffering reactions in the catholyte:

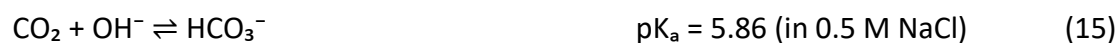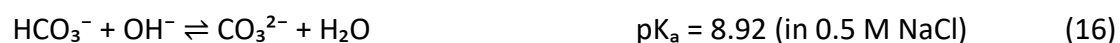

## 4. ESI-IV SUPPLEMENTARY RESULTS

### 4.1 MWAL

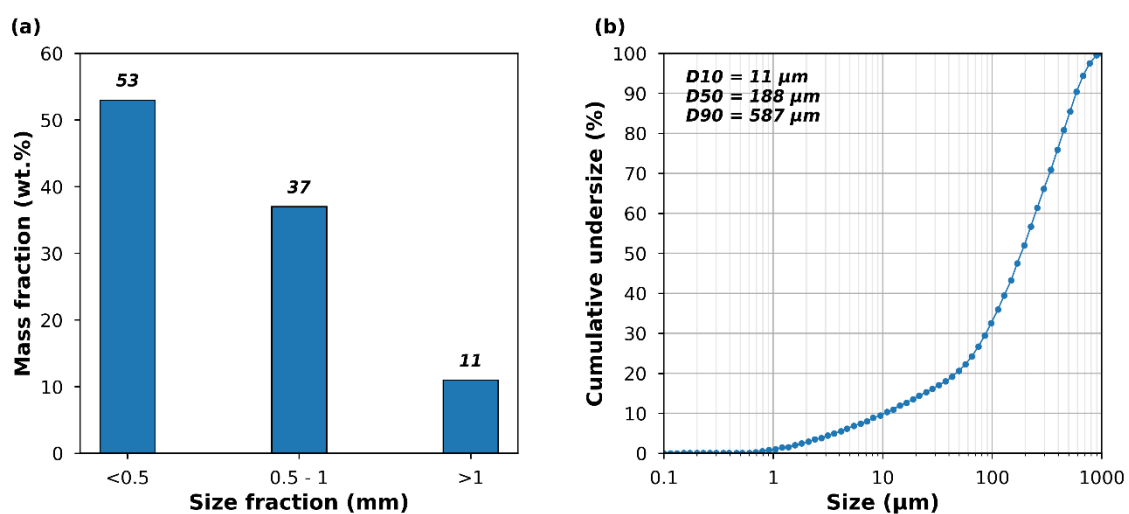

Figure S3. Particle size distribution of the spent automotive catalyst sample. (a) Mass fraction obtained by sieving into three size classes: <0.5 mm, 0.5–1 mm, and >1 mm. (b) Cumulative undersize distribution of the <0.5 mm fraction measured by laser diffraction, with characteristic particle diameters  $D_{10} = 11 \mu\text{m}$ ,  $D_{50} = 188 \mu\text{m}$ , and  $D_{90} = 587 \mu\text{m}$ .

Table S3. Chemical composition of the spent automotive catalyst used in this study, in mg kg<sup>-1</sup>.

| Al    | As  | Ba  | Ca   | Ce    | Co | Cr  | Cu  | Fe   | La   | Mg   | Mn  | Mo | Na     | Nd  | Ni  | Pb  | Pd   | Pt  | Rh  | Si   | Sr   | Ti  | V  | Y  | Zn   | Zr |
|-------|-----|-----|------|-------|----|-----|-----|------|------|------|-----|----|--------|-----|-----|-----|------|-----|-----|------|------|-----|----|----|------|----|
| 57168 | 221 | 695 | 3547 | 16516 | -  | 213 | 126 | 3874 | 2421 | 8853 | 129 | 42 | 473147 | 642 | 232 | 368 | 1700 | 943 | 272 | 3632 | 1684 | 179 | 21 | 11 | 1874 | -  |

Table S4. Composition of the L/S=10 - 6 M HCl leaching solution from the spent automotive catalyst, in mg L<sup>-1</sup>.

|       | Cond /<br>pH | ORP /<br>mS cm <sup>-1</sup> mV | Al  | As    | Ba   | Ca  | Ce  | Co   | Cr   | Cu   | Fe   | La  | Mg  | Mn   | Mo   | Na  | Nd  | Ni  | Pb   | Pd   | Pt    | Rh   | Si   | Sr | Ti  | V  | Y   | Zn  | Zr  |      |
|-------|--------------|---------------------------------|-----|-------|------|-----|-----|------|------|------|------|-----|-----|------|------|-----|-----|-----|------|------|-------|------|------|----|-----|----|-----|-----|-----|------|
| Value | -0.92        | 250                             | 581 | 11161 | 26.4 | 207 | 357 | 2487 | 0.51 | 23.5 | 12.7 | 508 | 306 | 2816 | 16.2 | 9.4 | 104 | 106 | 25.7 | 38.3 | 163.8 | 95.2 | 29.2 | 74 | 174 | 99 | 3.0 | 3.3 | 204 | <0.2 |
| SD    | 0.10         | -                               | 38  | 5284  | 0.9  | 47  | 7   | 423  | 0.1  | 3.3  | 1.0  | 115 | 25  | 1737 | 3.1  | 0.5 | 24  | 12  | 7.3  | 1.6  | 5.3   | 6.0  | 3.4  | 6  | 7   | 47 | 1.2 | 1.5 | 36  | -    |

Table S5. Composition of the L/S=10 - 1.5 M NaCl, 1.5 M HCl leaching solution from the spent automotive catalyst, in mg L<sup>-1</sup>.

|       | Cond /<br>pH | ORP /<br>mS cm <sup>-1</sup> mV | Al    | As   | Ba | Ca | Ce  | Co   | Cr   | Cu   | Fe   | La  | Mg  | Mn  | Mo   | Na  | Nd    | Ni | Pb | Pd | Pt    | Rh   | Si   | Sr  | Ti  | V  | Y   | Zn  | Zr  |      |
|-------|--------------|---------------------------------|-------|------|----|----|-----|------|------|------|------|-----|-----|-----|------|-----|-------|----|----|----|-------|------|------|-----|-----|----|-----|-----|-----|------|
| Value | -0.13        | 250                             | 581.5 | 5431 | 21 | 66 | 337 | 1569 | <0.5 | 20.2 | 12.0 | 368 | 230 | 841 | 12.3 | 4   | 44949 | 61 | 22 | 35 | 155.3 | 84.5 | 22.9 | 345 | 160 | 17 | 2   | 1   | 178 | <0.2 |
| SD    | 0.12         | -                               | 11    | 1911 | 2  | 23 | 8   | 151  | -    | 3.7  | 0.3  | 28  | 14  | 235 | 1.6  | 0.5 | 1384  | 5  | 6  | 1  | 4.1   | 6.7  | 4.1  | 9   | 3   | 2  | 0.1 | 0.1 | 14  | -    |

Table S6. Composition of the L/S=5, leaching composition: 1.5 M NaCl, 1.5 M HCl leaching solution from the spent automotive catalyst, in mg L<sup>-1</sup>.

|       | Cond /<br>pH | ORP /<br>mS cm <sup>-1</sup> mV | Al  | As    | Ba | Ca  | Ce  | Co   | Cr  | Cu   | Fe   | La  | Mg  | Mn   | Mo   | Na  | Nd    | Ni  | Pb | Pd | Pt    | Rh    | Si   | Sr  | Ti  | V   | Y   | Zn  | Zr  |     |
|-------|--------------|---------------------------------|-----|-------|----|-----|-----|------|-----|------|------|-----|-----|------|------|-----|-------|-----|----|----|-------|-------|------|-----|-----|-----|-----|-----|-----|-----|
| Value | 0.61         | 250                             | 521 | 10354 | 35 | 4.6 | 582 | 2643 | 0.8 | 57.4 | 21.7 | 580 | 418 | 1268 | 22.3 | 6.8 | 34700 | 105 | 96 | 57 | 268.0 | 170.0 | 49.8 | 314 | 283 | 4.1 | 2.7 | 1.9 | 329 | 0.5 |

## 4.2 GDEx

Table S7. Dissolution of the GDE mesh during treatment of 6 M HCl leachates. Dissolution of mesh metals as a function of the current density applied.

| Leaching solution      | Polarization            | Treatment time/min | Dissolved mass* / mg |      |       |     |      |
|------------------------|-------------------------|--------------------|----------------------|------|-------|-----|------|
|                        |                         |                    | Fe                   | Ni   | Cr    | Mn  | Mo   |
| 1.5 M NaCl + 1.5 M HCl | 10 mA cm <sup>-2</sup>  | 240                | 3.0                  | 1.5  | 3.9   | -   | 0.3  |
|                        | 40 mA cm <sup>-2</sup>  | 120                | 11.0                 | 2.1  | 3.5   | 0.1 | -    |
|                        | 200 mA cm <sup>-2</sup> | 60                 | 5.0                  | 0.6  | 1.2   | -   | 0.0  |
| 6 M HCl                | 10 mA cm <sup>-2</sup>  | 240                | 384.0                | 56.9 | 104.3 | 6.2 | 10.7 |
|                        | 40 mA cm <sup>-2</sup>  | 120                | 276.0                | 40.7 | 63.3  | 4.5 | 7.6  |
|                        | 200 mA cm <sup>-2</sup> | 60                 | 85.0                 | 18.8 | 24.3  | 1.5 | 2.3  |

\*The dissolved mass was calculated by subtracting the final metal concentration from the initial concentration and multiplying it by the volume of the solution.

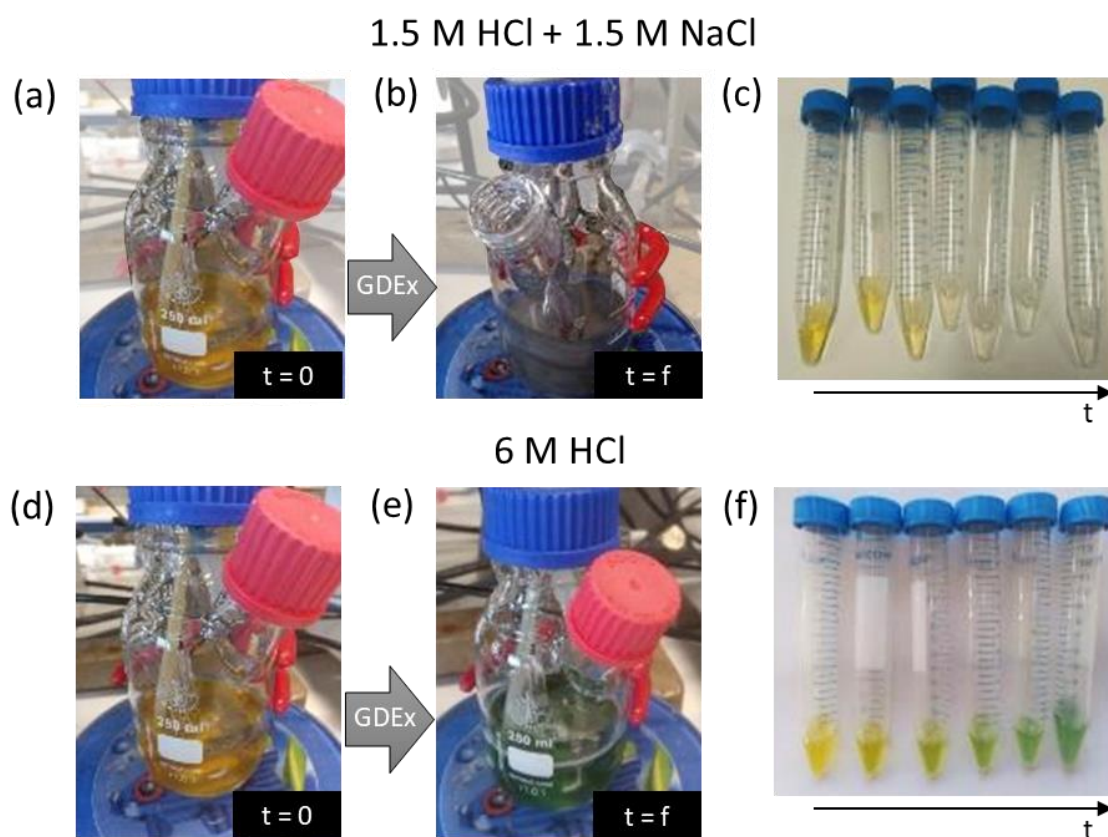

Figure S4. Visual representation of the evolution of the samples throughout the GDEx treatment. 1.5 M HCl + 1.5 M NaCl leachate solution (a) before and (b) after the GDEx process. (c) Evolution of the 1.5 M HCl + 1.5 M NaCl leachate solution through time, the yellow color disappears as the PGMs are removed, and under conditions where the GDE mesh corrosion does not occur. 6 M HCl leachate solution (d) before and (e) after the GDEx process. (f) Evolution of the 6 M HCl leachate solution through time, the solution turned green due to the leaching of Fe and Ni ions from the GDE's stainless-steel mesh.

Table S8. Composition of the recovered MWAL-treated GDEx-nanoparticles (leaching solution: NaCl 1.5 M and HCl 1.5 M). The data are derived from the digestion of the particles and ICP-OES analysis.

| Element         | Metal content in the solid / % w/w |                         |                          |
|-----------------|------------------------------------|-------------------------|--------------------------|
|                 | -10 mA cm <sup>-2</sup>            | -40 mA cm <sup>-2</sup> | -200 mA cm <sup>-2</sup> |
| Pd              | 49.2                               | 48.1                    | 54.3                     |
| Pt              | 28.0                               | 28.2                    | 30.5                     |
| Rh              | 7.1                                | 7.1                     | 6.3                      |
| Cu              | 3.8                                | 2.7                     | 1.8                      |
| Pb              | 9.3                                | 8.9                     | 5.4                      |
| Al              | 0.3                                | 0.6                     | 0.1                      |
| Others          | 2.7                                | 5.1                     | 1.6                      |
| PGM content (%) | 84.2                               | 83.3                    | 91.2                     |

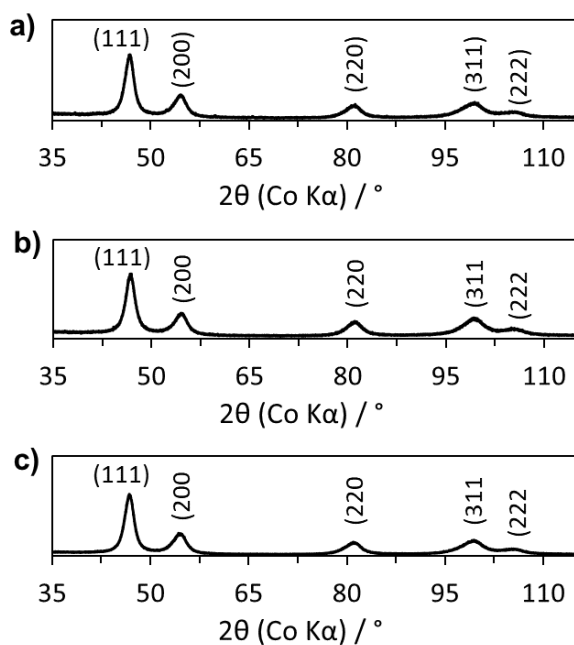

Figure S5. XRD spectra of the recovered solids after treating the 1.5 M HCl + 1.5 M NaCl leachate solutions with the GDEx process at a) 10 mA cm<sup>-2</sup>, b) 40 mA cm<sup>-2</sup> and c) 200 mA cm<sup>-2</sup>.

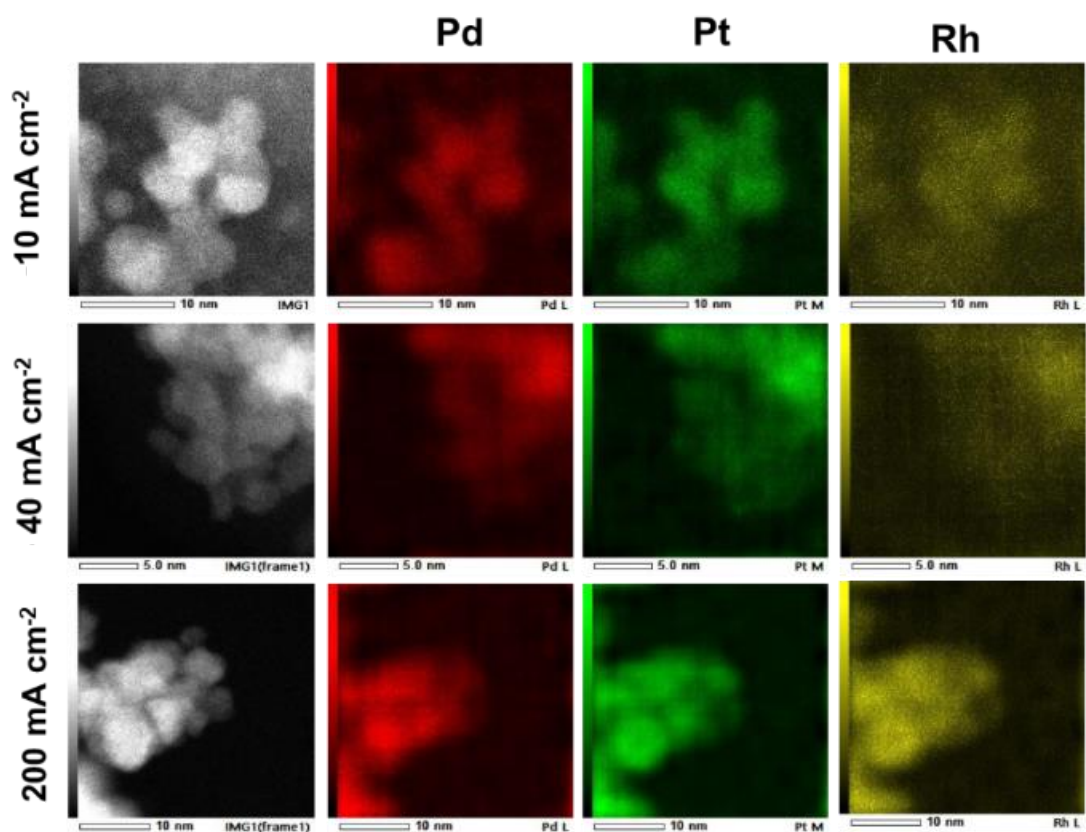

Figure S6. STEM-EDXS analysis of the products isolated after treating the 1.5 M HCl + 1.5 M NaCl leachate solutions with the GDEx process. Pd, Pt, and Rh are homogeneously distributed throughout the 5 nm nanoparticles, indicating the formation of an alloy structure.

Table S9. PGM surface atomic composition of the products obtained after the treatment of the 1.5 M HCl + 1.5 M NaCl leachate solutions with the GDEx process. Quantitative data acquired from the STEM-EDXS analysis.

| Sample                  | Atomic percentage (%) |       |       |
|-------------------------|-----------------------|-------|-------|
|                         | Pd                    | Pt    | Rh    |
| 10 mA cm <sup>-2</sup>  | 70.28                 | 16.44 | 13.28 |
| 40 mA cm <sup>-2</sup>  | 71.72                 | 20.49 | 7.79  |
| 200 mA cm <sup>-2</sup> | 34.18                 | 41.45 | 24.37 |

Table S10. Preselected default GDEx operating conditions

|                                     |                                   |
|-------------------------------------|-----------------------------------|
| Current density                     | -40 mA cm <sup>-2</sup>           |
| Gas flow regime                     | Flow by                           |
| CO <sub>2</sub> gas flow rate       | 200 mL min <sup>-1</sup>          |
| Catholyte volume                    | 100 mL                            |
| Anolyte volume                      | 250 mL                            |
| Electrolyte recirculation flow rate | 100 mL min <sup>-1</sup>          |
| Gas diffusion electrode             | VITO-CoRE® (stainless steel mesh) |
| MWAL L/S ratio                      | L/S=10                            |
| MWAL composition                    | NaCl: 1.5 M<br>HCl: 1.5 M         |

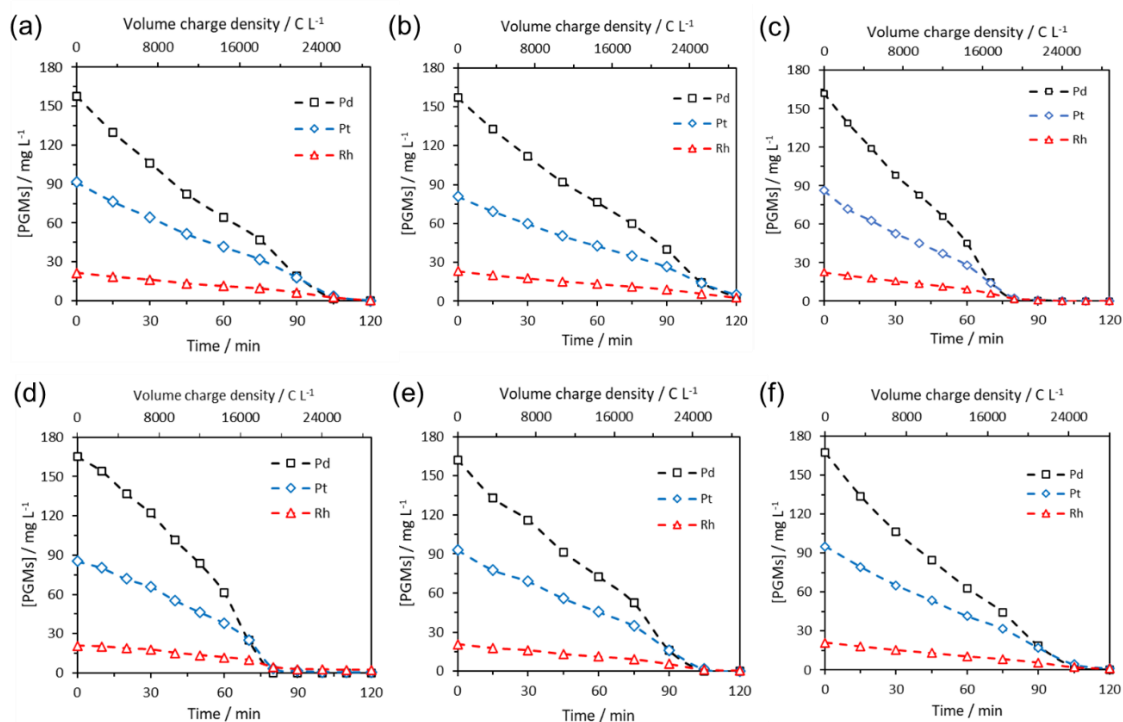

Figure S7. Comparison of experiments at  $40 \text{ mA cm}^{-2}$  and different parameters (100 mL solution). (a) Default conditions ( $200 \text{ mL min}^{-1}$ , flow-by, VITO-CoRE® GDE, no sonication); (b) gas flow rate of  $20 \text{ mL min}^{-1}$ , flow-by; (c) flow-through regime ( $\text{CO}_2$  gas flow rate of  $5 \text{ mL min}^{-1}$ ); (d) sonication in recirculation tank; (e) anolyte used is  $\text{Na}_2\text{SO}_4$ , (f) Ti mesh in GDE.

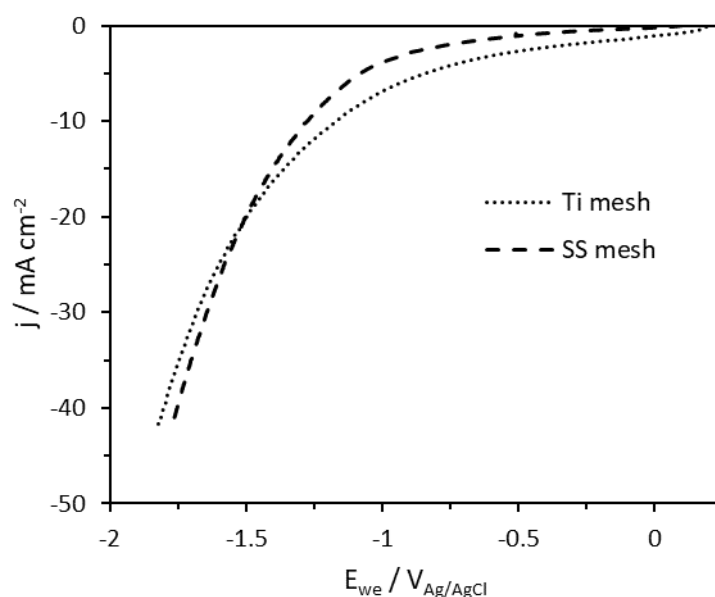

Figure S8. Linear Sweep Voltammograms were performed on meshes of different materials: SS mesh (used in the original VITO-CoRE® design) and black titanium mesh. The mesh size was 32 (Tyler Equivalent Mesh), with a window size of approximately  $500 \mu\text{m}$ . The geometrical area of the tested meshes was  $10 \text{ cm}^2$ .

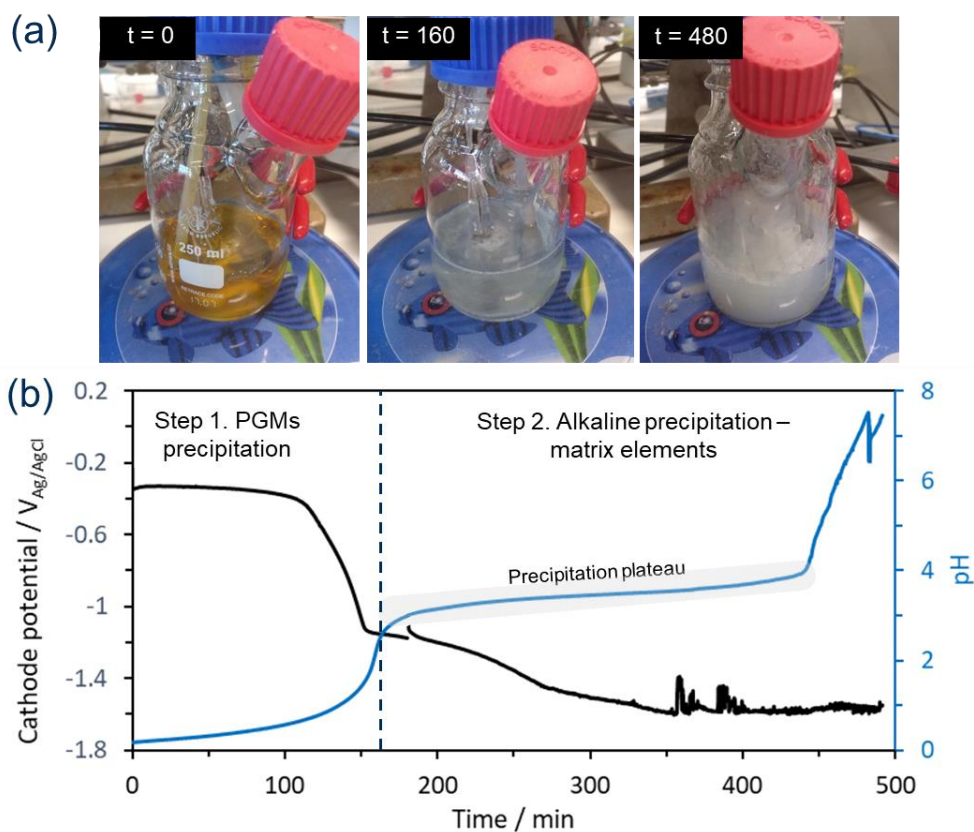

Figure S9. Treatment of automotive catalyst leachate (initial leaching solution: 1.5 M HCl + 1.5 M NaCl, L/S=10). (a) Appearance of the leachate at  $t = 0$  when no precipitation had occurred (yellow color is due to the PGM ions presence), up to  $t = 160$  min the precipitation of the PGMs took place (transparent solution with PGM particles in suspension), and after  $t = 160$ , when pH exceeded 2, precipitation of the matrix elements occurred, with a jelly texture and high viscosity, primarily due to aluminum and silicon (hydr)oxides. (b) Evolution of cathode potential and pH vs time, displaying pH plateau at  $\text{pH} > 2$ , when the alkaline precipitation of matrix elements occurred.

Table S11. Precipitation yield of metals after step 1 ( $t = 160$  min) and step 2 ( $t = 490$  min)

| Precipitation yield (%) | Rh   | Pd   | Pt   | Cu   | Pb   | Si  | Ti  | V   | Mo  | Al  | Ce   | Cr   | Fe   | La   | Mn  | Nd  | Ni   |
|-------------------------|------|------|------|------|------|-----|-----|-----|-----|-----|------|------|------|------|-----|-----|------|
| Step 1                  | 99.3 | 99.2 | 99.5 | 95.8 | 94.4 | -   | -   | -   | -   | -   | -    | -    | -    | -    | -   | -   | -    |
| Step 2                  | -    | -    | -    | 100  | 100  | 100 | 100 | 100 | 100 | 100 | 99.9 | 98.1 | 94.4 | 99.2 | 100 | 100 | 89.7 |

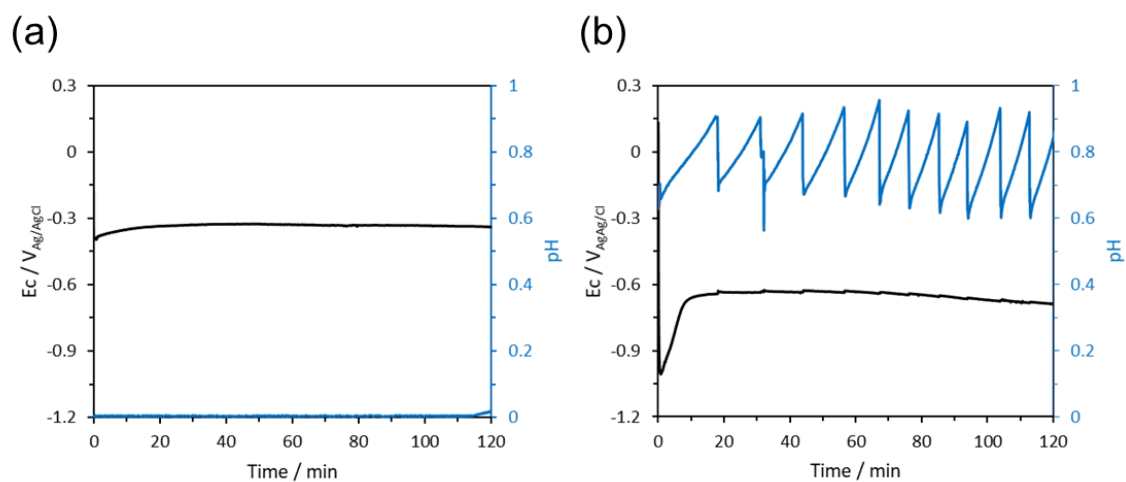

Figure S10. Cathode potential and pH evolution of the different MWAL samples during their treatment with GDEx. (a) L/S = 10, (b) L/S = 5. In (b), continuous acidification was applied to keep pH below 1 (see sawtooth pattern in the pH profile resulting from periodic 36% HCl aliquot additions).

### 4.3 Assessment of the recovered PGM NPs as electrocatalysts for the Methanol Oxidation Reaction (MOR)

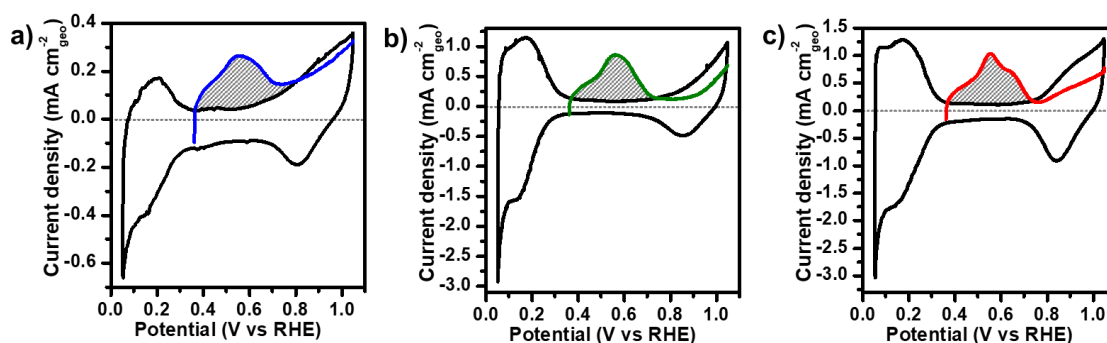

Figure S11. Background (black) and CuUPD stripping voltammetry (colour) for the PGM NPs recovered with GDEx at a)  $10 \text{ mA cm}^{-2}$ , b)  $40 \text{ mA cm}^{-2}$ , c)  $200 \text{ mA cm}^{-2}$ . The UPD stripping curves were obtained in  $0.5 \text{ M H}_2\text{SO}_4$  and  $5 \text{ mM CuSO}_4$ , with the copper adsorbed at  $0.360 \text{ V}$  for  $100 \text{ s}$ . Background scans were performed in  $0.5 \text{ M H}_2\text{SO}_4$ . In all cases, the scan rate was  $10 \text{ mV s}^{-1}$ .

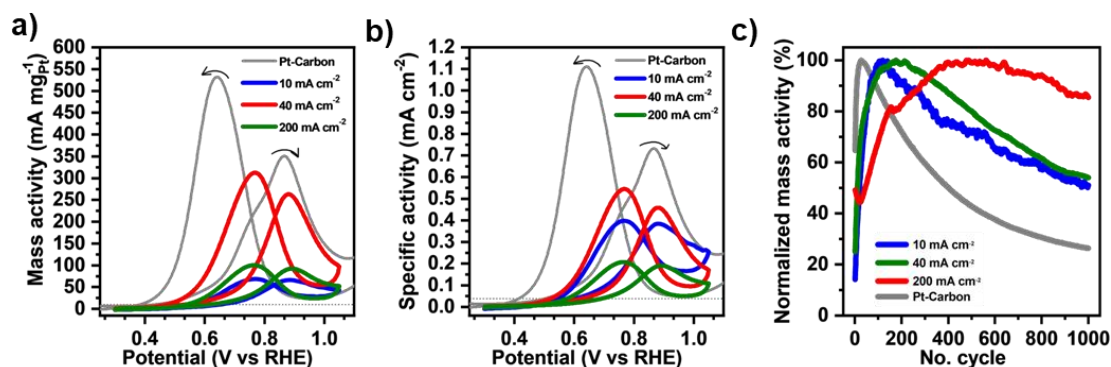

Figure S12. Electrocatalytic performance of the PGM nanoparticles recovered with GDEx towards the methanol oxidation reaction. a) Mass activity normalised to the Pt content, b) Specific activity normalised to ECSA, and c) Accelerated durability. The CVs were recorded in  $0.5 \text{ M H}_2\text{SO}_4 + 1.0 \text{ M}$  methanol solution at  $50 \text{ mV s}^{-1}$ .

#### 4.4 Life cycle assessment

Table S12. Characterised Environmental Impacts by Process Stage (Base Case: L/S=5, -200 mA cm<sup>-2</sup> and 1.5 M NaCl)

| Impact category | Unit                   | Milling  | MWAL     | GDEx     | Total    | Standard deviation | Coeff. of variation |
|-----------------|------------------------|----------|----------|----------|----------|--------------------|---------------------|
| CC              | kg CO <sub>2</sub> eq  | 1.22E-02 | 4.57E-01 | 1.10E-01 | 5.79E-01 | 0.0259             | 4.47%               |
| OD              | kg CFC11 eq            | 2.28E-10 | 1.18E-08 | 4.55E-09 | 1.66E-08 | 3.66E-09           | 22.10%              |
| POF             | kg NMVOC eq            | 3.16E-05 | 1.24E-03 | 3.08E-04 | 1.58E-03 | 1.27E-04           | 8.06%               |
| PMF             | disease incidence      | 2.49E-10 | 1.14E-08 | 4.21E-09 | 1.59E-08 | 2.51E-09           | 15.80%              |
| HTnc            | CTUh                   | 1.90E-10 | 6.80E-09 | 1.66E-09 | 8.65E-09 | 5.26E-07           | 1340%               |
| HTc             | CTUh                   | 3.38E-12 | 6.13E-10 | 5.65E-10 | 1.18E-09 | 2.35E-09           | 172%                |
| AC              | mol H+ eq              | 7.01E-05 | 2.45E-03 | 6.10E-04 | 3.13E-03 | 1.95E-04           | 6.23%               |
| EP              | kg P eq                | 1.17E-05 | 3.98E-04 | 8.84E-05 | 4.98E-04 | 2.96E-04           | 62%                 |
| ETX             | CTUe                   | 2.00E-02 | 1.03E+00 | 1.33E+00 | 2.38E+00 | 7.15E+00           | 140%                |
| WF              | m <sup>3</sup> depriv. | 2.95E-03 | 5.69E-02 | 9.08E-02 | 1.51E-01 | 1.83E+01           | 2060%               |
| ADff            | MJ                     | 2.06E-01 | 6.54E+00 | 1.22E+00 | 7.97E+00 | 1.56E+00           | 20%                 |
| ADe             | kg Sb eq               | 1.64E-07 | 6.24E-06 | 1.63E-06 | 8.03E-06 | 1.90E-06           | 23.80%              |
| CED             | MJ                     | 4.79E-02 | 1.51E+00 | 2.74E-01 | 1.83E+00 | 3.40E-01           | 25%                 |

Monte Carlo (n = 1,000) used triangular/log-normal parameterization for foreground energy and reagent use and Ecoinvent pedigree for background. For ETX/HTc/HTnc/WF, wider confidence intervals reflect method- and dataset-related variance (e.g., fate/exposure modelling, regional water factors). We report medians with 95% CIs and use these categories for qualitative interpretation; quantitative scenario decisions are based on more stable midpoints (CC, CED, AC, POF).

Table S13. Disaggregated Environmental Impacts (Base Case: L/S=5, -200 mA cm<sup>-2</sup> and 1.5 M NaCl): Characterised values

| Impact category | Unit                   | Electricity (milling) | Electricity (MWL) | HCl (MWL) | Waste (MWL) | Electricity (GDEx) | NaCl (GDEx) | CO <sub>2</sub> (GDEx) | Tap water (GDEx) | Waste anolyte (GDEx) | Waste supernatant (GDEx) | Cl <sub>2</sub> /CO <sub>2</sub> air emission (GDEx) |
|-----------------|------------------------|-----------------------|-------------------|-----------|-------------|--------------------|-------------|------------------------|------------------|----------------------|--------------------------|------------------------------------------------------|
| <b>CC</b>       | kg CO <sub>2</sub> eq  | 1.22E-02              | 3.31E-01          | 1.15E-01  | 1.13E-02    | 2.65E-02           | 2.14E-05    | 2.42E-03               | 3.63E-04         | 7.23E-03             | 7.19E-02                 | 1.22E-03                                             |
| <b>OD</b>       | kg CFC11 eq            | 2.28E-10              | 6.17E-09          | 5.33E-09  | 3.09E-10    | 4.94E-10           | 2.05E-13    | 3.75E-11               | 5.38E-12         | 3.69E-10             | 3.65E-09                 | 0.00E+00                                             |
| <b>POF</b>      | kg NMVOC eq            | 3.16E-05              | 8.55E-04          | 2.85E-04  | 9.90E-05    | 6.84E-05           | 9.28E-08    | 4.19E-06               | 1.17E-06         | 2.08E-05             | 2.14E-04                 | 0.00E+00                                             |
| <b>PM</b>       | disease incidence      | 2.49E-10              | 6.74E-09          | 3.19E-09  | 1.49E-09    | 5.39E-10           | 1.57E-12    | 4.10E-11               | 2.24E-11         | 3.20E-10             | 3.28E-09                 | 0.00E+00                                             |
| <b>HTnc</b>     | CTUh                   | 1.90E-10              | 5.14E-09          | 1.48E-09  | 1.92E-10    | 4.11E-10           | 5.06E-13    | 9.81E-11               | 2.01E-11         | 1.03E-10             | 1.03E-09                 | 0.00E+00                                             |
| <b>HTc</b>      | CTUh                   | 3.38E-12              | 9.14E-11          | 5.18E-10  | 3.64E-12    | 7.31E-12           | 9.87E-15    | 7.41E-13               | 4.37E-13         | 5.16E-11             | 5.05E-10                 | 0.00E+00                                             |
| <b>AC</b>       | mol H+ eq              | 7.01E-05              | 1.89E-03          | 4.65E-04  | 8.64E-05    | 1.51E-04           | 1.52E-07    | 6.40E-06               | 1.94E-06         | 4.09E-05             | 4.09E-04                 | 0.00E+00                                             |
| <b>EP</b>       | kg P eq                | 1.17E-05              | 3.16E-04          | 7.26E-05  | 9.32E-06    | 2.53E-05           | 1.21E-08    | 7.02E-07               | 2.33E-07         | 5.68E-06             | 5.65E-05                 | 0.00E+00                                             |
| <b>ETX</b>      | CTUe                   | 2.00E-02              | 5.41E-01          | 4.47E-01  | 4.31E-02    | 4.33E-02           | 9.89E-05    | 3.31E-03               | 5.91E-04         | 6.66E-02             | 6.56E-01                 | 5.63E-01                                             |
| <b>WF</b>       | m <sup>3</sup> depriv. | 2.95E-03              | 7.98E-02          | 4.45E-02  | -6.74E-02   | 6.38E-03           | 1.02E-05    | 4.49E-04               | 5.20E-02         | 3.60E-03             | 2.84E-02                 | 0.00E+00                                             |
| <b>ADff</b>     | MJ                     | 2.06E-01              | 5.56E+00          | 9.61E-01  | 1.46E-02    | 4.45E-01           | 1.42E-04    | 1.04E-02               | 4.42E-03         | 7.06E-02             | 6.93E-01                 | 0.00E+00                                             |
| <b>Ade</b>      | kg Sb eq               | 1.64E-07              | 4.44E-06          | 1.77E-06  | 2.88E-08    | 3.55E-07           | 6.66E-10    | 2.78E-08               | 1.99E-09         | 1.15E-07             | 1.13E-06                 | 0.00E+00                                             |
| <b>CED</b>      | MJ                     | 4.79E-02              | 1.30E+00          | 2.12E-01  | 3.17E-03    | 1.04E-01           | 3.07E-05    | 2.33E-03               | 9.48E-04         | 1.55E-02             | 1.52E-01                 | 0.00E+00                                             |

Table S14. Comparison of Environmental Impacts between Base Case and Alternative Scenarios:  
Characterised values

| <b>Impact category</b> | <b>Unit</b>            | <b>L/S=5, -200 mA cm<sup>-2</sup> and NaCl</b> | <b>L/S=5, -40 mA cm<sup>-2</sup> and NaCl</b> | <b>L/S=5, -200 mA cm<sup>-2</sup> and Na<sub>2</sub>SO<sub>4</sub></b> |
|------------------------|------------------------|------------------------------------------------|-----------------------------------------------|------------------------------------------------------------------------|
| <b>CC</b>              | kg CO <sub>2</sub> eq  | 5.79E-01                                       | 5.77E-01                                      | 5.92E-01                                                               |
| <b>OD</b>              | kg CFC11 eq            | 1.66E-08                                       | 1.64E-08                                      | 1.68E-08                                                               |
| <b>POF</b>             | kg NMVOC eq            | 1.58E-03                                       | 1.55E-03                                      | 1.61E-03                                                               |
| <b>PM</b>              | disease incidence      | 1.59E-08                                       | 1.57E-08                                      | 1.61E-08                                                               |
| <b>HTnc</b>            | CTUh                   | 8.65E-09                                       | 8.64E-09                                      | 8.86E-09                                                               |
| <b>HTc</b>             | CTUh                   | 1.18E-09                                       | 1.18E-09                                      | 1.19E-09                                                               |
| <b>AC</b>              | mol H+ eq              | 3.13E-03                                       | 3.06E-03                                      | 3.20E-03                                                               |
| <b>EP</b>              | kg P eq                | 4.98E-04                                       | 4.87E-04                                      | 5.10E-04                                                               |
| <b>ETX</b>             | CTUe                   | 2.38E+00                                       | 2.14E+00                                      | 1.84E+00                                                               |
| <b>WF</b>              | m <sup>3</sup> depriv. | 1.51E-01                                       | 1.48E-01                                      | 1.54E-01                                                               |
| <b>ADff</b>            | MJ                     | 7.97E+00                                       | 7.77E+00                                      | 8.19E+00                                                               |
| <b>ADe</b>             | kg Sb eq               | 8.03E-06                                       | 7.91E-06                                      | 8.21E-06                                                               |
| <b>CED</b>             | MJ                     | 1.83E+00                                       | 1.79E+00                                      | 1.89E+00                                                               |

#### 4.5 Techno-Economic Assessment

The TEA considered a base treatment capacity of 50 L h<sup>-1</sup> and an upscaled capacity of 100 L h<sup>-1</sup>, together with additional economic scenarios addressing higher spent automotive catalyst cost and increased product selling price. The detailed CAPEX and OPEX assumptions for the 50 L h<sup>-1</sup> and 100 L h<sup>-1</sup> cases are provided in Tables S15–S18.

For GDEx, scale-up was treated by numbering-up cells/stacks to maintain the same charge input per treated volume at the selected current density. Each cell was assumed to provide 325 cm<sup>2</sup> of available electrode area, with a maximum of six cells per stack. Thus, the required number of cells was calculated as  $N_{\text{cells}} = A_{\text{required}}/325$ , with the result rounded up to ensure sufficient installed electrode area. The number of stacks was then calculated from the number of required cells and the maximum stack size:  $N_{\text{stacks}} = N_{\text{cells}}/6$ , again rounding up where needed. This gives 6 cells (1 stack) for 50 L h<sup>-1</sup> and 11 cells (2 stacks) for 100 L h<sup>-1</sup>. Stack costs include PTFE flow frames/channels, stainless-steel end plates, tie rods/compression hardware, and support stand; Pt-based anodes were included separately in CAPEX, while separators and gas-diffusion cathodes were treated as OPEX replacement items.

For MWAL, the number of reactors was calculated from the required MWAL treatment flowrate and the semi-batch cycle time. One filling-to-filling cycle was assumed to take approximately 8 min. With a filling volume of 1.2 L per reactor, this corresponds to an effective capacity of 9 L h<sup>-1</sup> per reactor. The required number of MWAL reactors was therefore obtained from the ratio between the target MWAL flowrate ( $Q_{\text{MWAL}}$ ) and this per-reactor capacity:  $N_{\text{MWAL}} = Q_{\text{MWAL}}/9$ ; with the result rounded up to ensure sufficient installed capacity. This gives 7 MWAL reactors for the 50 L h<sup>-1</sup> case and 13 MWAL reactors for the 100 L h<sup>-1</sup> case. In the integrated process, the MWAL flowrate used for sizing also accounts for internal stream recirculation and water losses.

Peripheral equipment such as pumps, filtration units, grinding/decanning units, sensors, and auxiliary components was assumed to be sufficiently oversized at the base scale to cover the 50–100 L h<sup>-1</sup> range and was therefore not scaled proportionally. This is a simplifying assumption and is acknowledged as a TEA limitation. A Lang factor of 3, together with maintenance and safety/contingency factors, was applied to account for installation, indirect costs, and scale-up uncertainty. Detailed CAPEX assumptions are provided in Tables S15 and S17.

The spent automotive catalyst input was estimated from the target PGM throughput and the average PGM content per catalyst unit. Each unit was assumed to contain 1.5 kg of catalyst material with a total PGM concentration of 2915 mg kg<sup>-1</sup>, corresponding to 4.37 g PGM per unit. The required number of catalyst units was therefore obtained by dividing the annual PGM demand by 4.37 g PGM unit<sup>-1</sup>. For the 100 L h<sup>-1</sup> scenario, this gives 117,427 units year<sup>-1</sup>, equivalent to 513.45 kg PGM year<sup>-1</sup> and an annual feedstock cost of 20.30 M€ year<sup>-1</sup> at 172.84 € per unit. This corresponds to 22.24 kg h<sup>-1</sup> of milled automotive catalyst entering MWAL and 29.76 kg h<sup>-1</sup> of moisturised residue/waste after PGM removal. Detailed OPEX assumptions are provided in Tables S16 and S18.

Table S15. Capital Expenditure (CAPEX) breakdown for the 50 and 100 L h<sup>-1</sup> scenarios.

| Item                                                          | Cost (€/unit) | Base scenario: 50 L h <sup>-1</sup> |                 | Scenario: 100 L h <sup>-1</sup> |                 |
|---------------------------------------------------------------|---------------|-------------------------------------|-----------------|---------------------------------|-----------------|
|                                                               |               | Quantity                            | Total Cost (k€) | Quantity                        | Total Cost (k€) |
| IBC container                                                 | 13,250        | 2                                   | 26.50           | 2                               | 26.50           |
| Fan + Chiller                                                 | 15,500        | 1                                   | 15.50           | 1                               | 15.50           |
| Grinder                                                       | 50,000        | 1                                   | 50.00           | 1                               | 50.00           |
| Decanning unit                                                | 15,000        | 1                                   | 15.00           | 1                               | 15.00           |
| MWAL reactors                                                 | 14,286        | 7                                   | 100.00          | 13                              | 185.71          |
| Heat Exchanger                                                | 1,000         | 2                                   | 2.00            | 2                               | 2.00            |
| Filtration Unit MWAL                                          | 50,000        | 1                                   | 50.00           | 1                               | 50.00           |
| Power Supply                                                  | 10,000        | 1                                   | 10.00           | 1                               | 10.00           |
| Electrochemical stack*                                        | 10,000        | 1 (6 unit cells)                    | 10.00           | 2 (11 unit cells)               | 20.00           |
| Pt/Ta anode**                                                 | 973           | 3                                   | 2.92            | 6                               | 5.838           |
| Recirc. tanks (Anolyte & Catholyte)                           | 500/5,000     | 1 each                              | 5.50            | 1 each                          | 5.50            |
| UV-Vis Spectrophotometer                                      | 15,000        | 1                                   | 15.00           | 1                               | 15.00           |
| Turbidimeters                                                 | 5,000         | 1                                   | 5.00            | 1                               | 5.00            |
| Settler                                                       | 1000          | 2                                   | 2.00            | 2                               | 2.00            |
| Dryer                                                         | 2,000         | 1                                   | 2.00            | 1                               | 2.00            |
| Pumps                                                         | 5,000         | 12                                  | 60,00           | 12                              | 60,00           |
| Temperature Sensors                                           | 500           | 5                                   | 2.50            | 5                               | 2.50            |
| pH meters                                                     | 3,000         | 3                                   | 9.00            | 3                               | 9.00            |
| Conductivity meters                                           | 3,000         | 2                                   | 6.00            | 2                               | 6.00            |
| Tanks                                                         | 500           | 4                                   | 0.20            | 4                               | 0.20            |
| <b>TOTAL CAPEX<br/>(before Lang factor and safety factor)</b> | -             | -                                   | <b>390.92</b>   | -                               | <b>499.55</b>   |

\* Includes PTFE flow frames/channels, stainless steel end plates, tie-rods/compression hardware, and the support stand for a 6-unit cell stack. Pt-based anodes are considered separately as another entry in CAPEX, and separator and gas-diffusion cathodes are considered in the OPEX.

\*\* Platinum-coated tantalum anodes with a geometric area of 325 cm<sup>2</sup> each. In the present stack layout, one anode is shared by two cells; therefore, three anodes are required for the 50 L h<sup>-1</sup> case and six anodes for the 100 L h<sup>-1</sup> case.

Table 16. Annual Operational Expenditure (OPEX) breakdown for the 50 and 100 L h<sup>-1</sup> scenarios

| Category                                                 | Item                                | Unit Cost (€)                        | Technical basis / assumptions                                     | Base scenario: 50 L h <sup>-1</sup>           |                                      | Scenario: 100 L h <sup>-1</sup>                |                                      |
|----------------------------------------------------------|-------------------------------------|--------------------------------------|-------------------------------------------------------------------|-----------------------------------------------|--------------------------------------|------------------------------------------------|--------------------------------------|
|                                                          |                                     |                                      |                                                                   | Quantity/Usage                                | Annual Cost (k€ year <sup>-1</sup> ) | Quantity/Usage                                 | Annual Cost (k€ year <sup>-1</sup> ) |
| Replacement                                              | Membrane/diaphragm                  | 500 per m <sup>2</sup>               | 4 replacements year <sup>-1</sup>                                 | 0.78 m <sup>2</sup> year <sup>-1</sup>        | 0.39                                 | 1.43 m <sup>2</sup> year <sup>-1</sup>         | 0.72                                 |
|                                                          | Gas Diffusion Electrodes            | 3000 per m <sup>2</sup>              | 4 replacements year <sup>-1</sup>                                 | 0.78 m <sup>2</sup> year <sup>-1</sup>        | 2.34                                 | 1.43 m <sup>2</sup> year <sup>-1</sup>         | 4.29                                 |
|                                                          | Tubing                              | 500 per maintenance                  | 5 replacements year <sup>-1</sup>                                 | -                                             | 2.50                                 | -                                              | 2.50                                 |
| Power                                                    | GEx-Stack                           | 200 per MWh                          | -                                                                 | 13.6 MWh year <sup>-1</sup>                   | 2.72                                 | 24.9 MWh year <sup>-1</sup>                    | 4.98                                 |
|                                                          | Pumps (12 units)                    |                                      | -                                                                 | 2.6 MWh year <sup>-1</sup>                    | 0.52                                 | 5.2 MWh year <sup>-1</sup>                     | 1.04                                 |
|                                                          | Grinding                            |                                      | 0.09 kWh kg <sup>-1</sup>                                         | 8,3 MWh year <sup>-1</sup>                    | 1.66                                 | 16.56 MWh year <sup>-1</sup>                   | 3.31                                 |
|                                                          | Decanning                           |                                      | 0.07 kWh kg <sup>-1</sup>                                         | 6,2 MWh year <sup>-1</sup>                    | 1.23                                 | 12.33 MWh year <sup>-1</sup>                   | 2.47                                 |
|                                                          | MWAL                                |                                      | 0.72 kWh L <sup>-1</sup>                                          | 222 MWh year <sup>-1</sup>                    | 44.39                                | 444 MWh year <sup>-1</sup>                     | 88.76                                |
| MWAL Input                                               | Spent automotive catalyst (AC)      | 172.84 per spent AC                  | 1.5 kg monolith per spent AC unit                                 | 58,714 units <sub>AC</sub> year <sup>-1</sup> | 10,147.71                            | 117,427 units <sub>AC</sub> year <sup>-1</sup> | 20,295.42                            |
| Chemicals                                                | HCl                                 | 0.2 per L                            | Make-up/reacidification for 1.5 M HCl leaching medium             | 49,024 L year <sup>-1</sup>                   | 9.81                                 | 98,047 L year <sup>-1</sup>                    | 19.61                                |
|                                                          | NaCl                                | 0.2 per kg                           | NaCl for anolyte                                                  | 18,514 kg year <sup>-1</sup>                  | 3.70                                 | 37,028 kg year <sup>-1</sup>                   | 7.41                                 |
|                                                          | CO <sub>2</sub>                     | 300 per ton (0.00147 per NL)         | GEx gas feed: 0.4 mL min <sup>-1</sup> cm <sup>-2</sup>           | 46.8 L h <sup>-1</sup>                        | 32.73                                | 85.8 L h <sup>-1</sup>                         | 60.01                                |
| Water                                                    | Wash particles                      | 0.0015 per L                         | 500 L kg <sup>-1</sup>                                            | 112,039 L year <sup>-1</sup>                  | 0.53                                 | 224,326 L year <sup>-1</sup>                   | 0.93                                 |
|                                                          | Anolyte                             |                                      | 40% of catholyte flow rate                                        | 158,400 L year <sup>-1</sup>                  |                                      | 316,800 L year <sup>-1</sup>                   |                                      |
|                                                          | Heat exchanger                      |                                      | Cooling-water: 10 L h <sup>-1</sup>                               | 79,200 L year <sup>-1</sup>                   |                                      | 79,200 L year <sup>-1</sup>                    |                                      |
| Personnel                                                | Personnel Cost                      | 58,500 per person year <sup>-1</sup> | 4 persons                                                         | 4 persons                                     | 468.00                               | 4 persons                                      | 468.00                               |
| Drying                                                   | Energy drying                       | 200 per MWh                          | 540 kcal kg <sup>-1</sup> (80% humidity PGM NPs, 30% heat losses) | 0.81 MWh year <sup>-1</sup>                   | 0.16                                 | 1.61 MWh year <sup>-1</sup>                    | 0.32                                 |
| Waste management                                         | Spent leachate                      | 0.2 per L                            | PGM-depleted GEx supernatant (bleed)                              | 55,989 L year <sup>-1</sup>                   | 50.74                                | 111,977 L year <sup>-1</sup>                   | 101.48                               |
|                                                          | Spent anolyte                       | 0.1 per L                            | -                                                                 | 158,400 L year <sup>-1</sup>                  |                                      | 316,800 L year <sup>-1</sup>                   |                                      |
|                                                          | Moist PGM-depleted catalyst residue | 0.2 per kg                           | Residue after filtration/washing                                  | 118,526 kg year <sup>-1</sup>                 |                                      | 237,051 kg year <sup>-1</sup>                  |                                      |
| <b>TOTAL OPEX (Before Maintenance and Safety Factor)</b> | -                                   | -                                    |                                                                   | -                                             | <b>10,772.04</b>                     | -                                              | <b>21,067.09</b>                     |

Table S17. Adjusted CAPEX after application of Lang and safety factors for the 50 and 100 L h<sup>-1</sup> scenarios.

| Adjustment type             | Factor | Value (M€)                          |                                 |
|-----------------------------|--------|-------------------------------------|---------------------------------|
|                             |        | Base scenario: 50 L h <sup>-1</sup> | Scenario: 100 L h <sup>-1</sup> |
| Lang Factor                 | 3      | 1.17                                | 1.50                            |
| Safety Factor               | 20%    | 0.23                                | 0.30                            |
| <b>TOTAL ADJUSTED CAPEX</b> | -      | <b>1.41</b>                         | <b>1.80</b>                     |

Table S18. Adjusted OPEX after application of maintenance and safety factors for the 50 and 100 L h<sup>-1</sup> scenarios.

| Adjustment type            | Factor                                                 | Value (M€ year <sup>-1</sup> )      |                                 |
|----------------------------|--------------------------------------------------------|-------------------------------------|---------------------------------|
|                            |                                                        | Base scenario: 50 L h <sup>-1</sup> | Scenario: 100 L h <sup>-1</sup> |
| General Maintenance        | 10% of OPEX (excluding spent automotive catalyst cost) | 0.06                                | 0.08                            |
| Safety Factor              | 20% of OPEX (accounting for maintenance)               | 2.17                                | 4.23                            |
| <b>TOTAL ADJUSTED OPEX</b> | -                                                      | <b>13.00</b>                        | <b>25.35</b>                    |

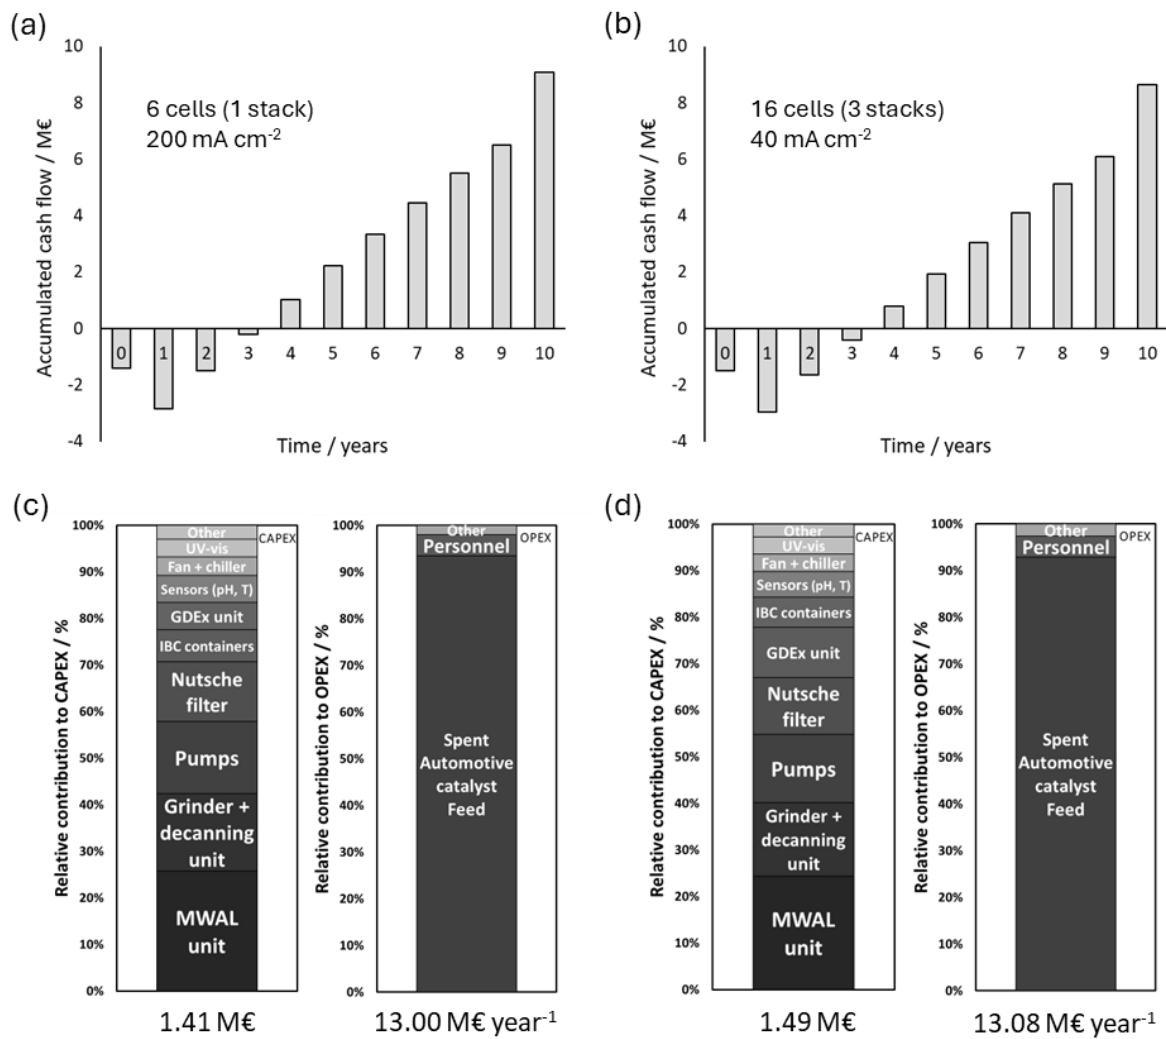

Figure S13. TEA results for different scale-up configurations at a treatment capacity of 50 L h<sup>-1</sup>. (a) and (b) present the same accumulated cash flow results of the scenarios where 6 cells and 200 mA cm<sup>-2</sup> current density or 16 cells and 40 mA cm<sup>-2</sup> are used, respectively. (c) and (d) CAPEX and OPEX breakdown of the aforementioned scenarios.

Table S19. Summary of results from TEA analysis and assumptions considered for Net Present Value (NPV) calculation for the 50 L h<sup>-1</sup> base scenario. Here,  $r$  denotes the discount rate and WACC the Weighted Average Cost of Capital.

|                                     |                 |
|-------------------------------------|-----------------|
| <b>Time horizon</b>                 | 10 years        |
| <b>CAPEX</b>                        | 1.41 M€         |
| <b>Working capital</b>              | 20 % (of sales) |
|                                     | 1.88 M€         |
| <b>Revenues</b>                     | 15.08 M€/year   |
| <b>OPEX</b>                         | 13.00 M€/year   |
| <b>Depreciation (linear)</b>        | 10 years        |
|                                     | 141 k€/year     |
| <b>Tax rate</b>                     | 35 %            |
| <b>Inflation rate</b>               | 3 %             |
| <b>Residual value</b>               | 10 % (of CAPEX) |
|                                     | 141 k€          |
| <b><math>r = \text{WACC}</math></b> | 7 %             |

Table S20. Year-by-year cash-flow schedule and discounted cash-flow (DCF) calculation for the NPV of the integrated MWAL–GDEx process over a 10-year horizon for the 50 L h<sup>-1</sup> base scenario. The assumptions used for the calculation are summarised in Table S19.

| Years                          | 0      | 1       | 2       | 3       | 4       | 5       | 6       | 7       | 8       | 9       | 10      |
|--------------------------------|--------|---------|---------|---------|---------|---------|---------|---------|---------|---------|---------|
| CAPEX / k€                     | -1,407 |         |         |         |         |         |         |         |         |         | 141     |
| Working capital / k€           |        | -2,953  |         |         |         |         |         |         |         |         | 2,953   |
| Invested Funds (IF) / k€       | -1,407 | -2,953  |         |         |         |         |         |         |         |         | 3,094   |
| Sales (S) / k€                 |        | 14,764  | 15,207  | 15,663  | 16,133  | 16,617  | 17,116  | 17,629  | 18,158  | 18,703  | 19,264  |
| Costs (C) / k€                 |        | -11,784 | -12,137 | -12,501 | -12,876 | -13,263 | -13,660 | -14,070 | -14,492 | -14,927 | -15,375 |
| Depreciation / k€              |        | -141    | -141    | -141    | -141    | -141    | -141    | -141    | -141    | -141    | -141    |
| Profit before taxes (PBT) / k€ |        | 2,981   | 3,070   | 3,162   | 3,257   | 3,355   | 3,455   | 3,559   | 3,666   | 3,776   | 3,889   |
| Taxes (T) / k€                 |        | -1,043  | -1,075  | -1,107  | -1,140  | -1,174  | -1,209  | -1,246  | -1,283  | -1,322  | -1,361  |
| Profit after taxes (PAT) / k€  |        | 1,937   | 1,996   | 2,055   | 2,117   | 2,181   | 2,246   | 2,313   | 2,383   | 2,454   | 2,528   |
| Cash Earnings (CE) / k€        |        | 2,078   | 2,136   | 2,196   | 2,258   | 2,321   | 2,387   | 2,454   | 2,524   | 2,595   | 2,669   |
| Cash flow / k€                 | -1,407 | -875    | 2,136   | 2,196   | 2,258   | 2,321   | 2,387   | 2,454   | 2,524   | 2,595   | 5,762   |
| Discounted cash flow (PV) / k€ | -1,407 | -817    | 1,866   | 1,793   | 1,722   | 1,655   | 1,590   | 1,528   | 1,469   | 1,411   | 2,929   |
| Cumulative NPV / k€            | -1,407 | -2,225  | -359    | 1,434   | 3,156   | 4,811   | 6,402   | 7,930   | 9,399   | 10,810  | 13,739  |
